# Supplementary material for: Indoxyl Sulfate Might Play a Role in Sarcopenia, While Myostatin Is an Indicator of Muscle Mass in Patients with Chronic Kidney Disease: Analysis from the RECOVERY Study
Source: MDPI journal article supplement (doi:10.3390/toxins14100660), 2022-09-23
Supplement: s1 [file s1]

**Table S1.** Baseline characteristics of the study.

| Characteristics                      | Total (n = 150)    | Female (n = 53)    | Male (n = 97)     | P value |
|--------------------------------------|--------------------|--------------------|-------------------|---------|
| Age (years)                          | 65.0 ± 10.8        | 63.9 ± 11.4        | 65.6 ± 10.4       | 0.347   |
| Male, n (%)                          | 97 (64.7)          | 24 (45.3)          | 52 (53.6)         | 0.330   |
| Diabetes mellitus, n (%)             | 76 (50.7)          | 4.0 (3.0, 5.0)     | 4.0 (2.5, 5.0)    | 0.406   |
| Modified CCI score                   | 4.0 (3.0, 5.0)     | 25.2±3.6           | 25.3 ± 2.7        | 0.843   |
| Body mass index (kg/m <sup>2</sup> ) | 25.3 ± 3.0         |                    |                   |         |
| Laboratory results                   |                    |                    |                   |         |
| Hemoglobin (g/dL)                    | 12.3 ± 2.1         | 11.2 ± 1.5         | 12.9 ± 2.1        | <0.001  |
| Total protein (g/L)                  | 7.4 ± 5.3          | 7.0 ± 0.5          | 6.9±0.5           | 0.165   |
| Albumin (g/L)                        | 4.3 (4.1, 4.5)     | 4.3 (4.0, 4.5)     | 4.3 (4.2, 4.6)    | 0.576   |
| Blood urea nitrogen (mg/dL)          | 32.0 ± 11.0        | 34.0 ± 12.5        | 30.8 ± 10.0       | 0.089   |
| Creatinine (mg/dL)                   | 1.9 (1.6, 2.5)     | 1.9 (1.6, 2.5)     | 1.9 (1.6, 2.4)    | 0.560   |
| eGFR (mL/min/1.73 m <sup>2</sup> )   | 33.8 ± 12.5        | 29.3 ± 11.7        | 36.3 ± 12.2       | 0.001   |
| C-reactive protein (mg/dL)           | 0.1 (0.0, 0.3)     | 0.1 (0.0, 0.3)     | 0.1 (0.0, 0.4)    | 0.089   |
| TNFα (pg/mL)                         | 1.6 (1.3, 2.0)     | 1.7 (1.4, 2.2)     | 1.5 (1.3, 1.9)    | 0.530   |
| IL-6 (pg/mL)                         | 1.8 (1.3, 2.9)     | 2.0 (1.3, 3.4)     | 1.8 (1.2, 2.9)    | 0.443   |
| iPTH (pg/mL)                         | 68.1 (45.7, 101.9) | 81.7 (57.3, 130.2) | 64.3 (39.0, 90.3) | 0.013   |
| 25(OH)D (ng/mL)                      | 14.3 (10.7, 18.6)  | 11.9 (9.5, 16.9)   | 14.8 (11.8, 20.1) | 0.141   |
| Hemoglobin A1c (%)                   | 6.3 (5.9, 7.4)     | 6.4 (5.9, 7.5)     | 6.3 (5.9, 7.3)    | 0.143   |
| Indoxyl sulfate (pg/mL)              | 0.4 (0.2, 0.6)     | 0.5 (0.3, 0.9)     | 0.3 (0.2, 0.5)    | 0.044   |
| Myostatin (pg/mL)                    | 4.8 ± 2.0          | 4.3±2.2            | 5.1±1.9           | 0.018   |
| Myostatin/SMI                        | 0.6 ± 0.2          | 0.6±0.2            | 0.6±0.2           | 0.798   |
| Muscle function                      |                    |                    |                   |         |
| SMI (kg/m <sup>2</sup> )             | 7.7 ± 1.2          | 6.8 ± 1.1          | 8.2 ± 1.0         | <0.001  |
| HGS (kg)                             | 28.4 ± 9.0         | 20.4 ± 5.0         | 32.9 ± 7.6        | <0.001  |
| 6-m GS (m/s)                         | 1.1 (0.8, 1.3)     | 1.0 (0.8, 1.2)     | 1.1 (0.8, 1.3)    | 0.158   |
| presarcopenia, n (%)                 | 17 (11.4)          | 9 (17.3)           | 8 (8.2)           | 0.097   |
| low muscle strength, n (%)           | 39 (26.0)          | 16 (30.2)          | 23 (23.7)         | 0.387   |
| low physical performance, n (%)      | 65 (43.3)          | 28 (52.8)          | 37 (38.1)         | 0.083   |
| Sarcopenia, n (%)                    | 14 (9.3)           | 8 (15.4)           | 6 (6.2)           | 0.067   |

Data are expressed as means ± standard deviations, medians (25<sup>th</sup>, 75<sup>th</sup> percentiles), or number (percentage). Abbreviations: CCI, Charlson comorbidity index; eGFR, estimated glomerular filtration rate; TNFα, tumor necrosis factor α; IL-6, interleukin-6; iPTH, intact parathyroid; 25(OH)D, 25-hydroxyvitamin D; SMI, skeletal muscle mass index; HGS, handgrip strength; GS, gait speed.

**Table S2.** Baseline characteristics according to CKD stages.

| Characteristics                      | Stage3A<br>(n = 37) | Stage3B<br>(n = 51)         | Stage4<br>(n = 54)               | Stage5<br>(n = 8)                   |
|--------------------------------------|---------------------|-----------------------------|----------------------------------|-------------------------------------|
| Age (years)                          | 63.7 ± 8.8          | 65.7 ± 9.9                  | 64.6 ± 12.9                      | 70.0 ± 7.4                          |
| Male, n (%)                          | 30 (81.1)           | 36 (70.6)                   | 28 (51.9)                        | 3 (37.5)                            |
| Diabetes mellitus, n (%)             | 15 (40.5)           | 24 (47.1)                   | 33 (61.1)                        | 4 (50.0)                            |
| Modified CCI score                   | 3.0 (2.0, 5.0)      | 4.0 (2.0, 5.0)              | 4.0 (3.0, 6.0)                   | 5.0 (2.5, 6.0)                      |
| Body mass index (kg/m <sup>2</sup> ) | 25.5 ± 2.5          | 25.4 ± 3.0                  | 25.3 ± 3.4                       | 22.5 ± 2.9                          |
| Laboratory results                   |                     |                             |                                  |                                     |
| Hemoglobin (g/dL)                    | 13.8 ± 2.0          | 12.4 ± 1.6 <sup>a</sup>     | 11.5 ± 1.9 <sup>a</sup>          | 10.8 ± 1.6 <sup>a</sup>             |
| Total protein (g/L)                  | 7.0 ± 0.5           | 6.9 ± 0.4                   | 6.9 ± 0.5                        | 7.2 ± 0.5                           |
| Albumin (g/L)                        | 4.4 (4.3, 4.7)      | 4.3 (4.2, 4.5)              | 4.3 (3.9, 4.5) <sup>a</sup>      | 4.4 (4.0, 4.7)                      |
| Blood urea nitrogen (mg/dL)          | 23.6 ± 6.3          | 29.4 ± 8.4 <sup>a</sup>     | 37.5 ± 9.8 <sup>ab</sup>         | 50.3 ± 11.2 <sup>abc</sup>          |
| Creatinine (mg/dL)                   | 1.5 (1.3, 1.6)      | 1.8 (1.6, 2.0) <sup>a</sup> | 2.5 (2.1, 2.9) <sup>ab</sup>     | 3.7 (3.4, 4.5) <sup>abc</sup>       |
| eGFR (mL/min/1.73 m <sup>2</sup> )   | 50.7 ± 4.8          | 36.3 ± 3.9 <sup>a</sup>     | 23.0 ± 4.1 <sup>ab</sup>         | 13.0 ± 1.4 <sup>abc</sup>           |
| C-reactive protein (mg/dL)           | 0.1 (0.0, 0.4)      | 0.1 (0.1, 0.5)              | 0.1 (0.0, 0.2)                   | 0.1 (0.0, 0.6)                      |
| TNFα (pg/mL)                         | 1.3 (1.0, 1.7)      | 1.5 (1.2, 1.7)              | 1.8 (1.5, 2.1)                   | 2.0 (1.9, 2.5)                      |
| IL-6 (pg/mL)                         | 1.5 (1.0, 2.4)      | 1.7 (1.2, 2.4)              | 2.7 (1.5, 3.6)                   | 2.6 (1.6, 3.6)                      |
| iPTH (pg/mL)                         | 48.1 (33.3, 65.1)   | 59.0 (42.7, 75.8)           | 92.1 (69.9, 151.1) <sup>ab</sup> | 149.0 (109.1, 191.1) <sup>abc</sup> |
| 25(OH)D (ng/mL)                      | 14.6 (11.9, 19.7)   | 15.3 (11.5, 23.2)           | 12.5 (9.6, 15.5)                 | 13.4 (10.9, 18.4)                   |
| Hemoglobin A1c (%)                   | 6.0 (5.5, 6.6)      | 6.6 (5.9, 7.5)              | 6.5 (6.0, 7.9) <sup>a</sup>      | 6.3 (5.7, 6.8)                      |
| Indoxyl sulfate (pg/mL)              | 0.2 (0.1, 0.3)      | 0.3 (0.2, 0.4)              | 0.6 (0.3, 0.9) <sup>ab</sup>     | 1.2 (1.0, 1.6) <sup>abc</sup>       |
| Myostatin (pg/mL)                    | 4.5 ± 1.5           | 4.7 ± 1.6                   | 5.2 ± 2.5                        | 3.9 ± 2.6                           |
| Myostatin/SMI                        | 0.6 ± 0.2           | 0.6 ± 0.2                   | 0.7 ± 0.3                        | 0.6 ± 0.3                           |
| Muscle function                      |                     |                             |                                  |                                     |
| SMI (kg/m <sup>2</sup> )             | 8.0 ± 1.1           | 7.9 ± 1.1                   | 7.5 ± 1.3                        | 6.4 ± 0.9 <sup>ab</sup>             |
| HGS (kg)                             | 31.9 ± 8.8          | 28.9 ± 9.5                  | 26.6 ± 8.3                       | 21.7 ± 4.7 <sup>a</sup>             |
| 6-m GS (m/s)                         | 1.0 (0.8, 1.2)      | 1.0 (0.9, 1.3)              | 1.1 (0.8, 1.3)                   | 1.0 (0.8, 1.2)                      |
| presarcopenia, n (%)                 | 2 (5.4)             | 6 (11.8)                    | 5 (9.4)                          | 4 (50.0)                            |
| low muscle strength, n (%)           | 6 (16.2)            | 14 (27.5)                   | 16 (29.6)                        | 3 (37.5)                            |
| low physical performance, n (%)      | 18 (48.6)           | 21 (41.2)                   | 22 (40.7)                        | 4 (50.0)                            |
| Sarcopenia, n (%)                    | 2 (5.4)             | 4 (7.8)                     | 4 (7.5)                          | 4 (50.0)                            |

Statistical significances were tested by Oneway analysis of variances among groups. <sup>a</sup>*P* value < 0.05 (mean values are significantly different from the Stage 3A group). <sup>b</sup>*P* value < 0.05 (mean values are significantly different from the Stage 3B group). <sup>c</sup>*P* value < 0.05 (mean values are significantly different from the Stage 4 group).

**Table S3.** Associations of myostatin levels with variables by linear regression analyses.

| Characteristics                      | Univariate            |         | Multivariate          |         |
|--------------------------------------|-----------------------|---------|-----------------------|---------|
|                                      | $\beta \pm \text{SE}$ | P value | $\beta \pm \text{SE}$ | P value |
| Age (years)                          | $-0.043 \pm 0.015$    | 0.005   | $-0.020 \pm 0.013$    | 0.114   |
| Modified CCI score                   | $-0.102 \pm 0.088$    | 0.246   |                       |         |
| Body mass index (kg/m <sup>2</sup> ) | $0.091 \pm 0.051$     | 0.074   |                       |         |
| Laboratory results                   |                       |         |                       |         |
| Hemoglobin (g/dL)                    | $0.155 \pm 0.080$     | 0.055   |                       |         |
| Total protein (g/dL)                 | $-0.236 \pm 0.354$    | 0.505   |                       |         |
| Albumin (g/dL)                       | $-0.321 \pm 0.484$    | 0.508   |                       |         |
| Blood urea nitrogen (mg/dL)          | $0.001 \pm 0.015$     | 0.928   |                       |         |
| Creatinine (mg/dL)                   | $0.384 \pm 0.228$     | 0.095   | $1.134 \pm 0.245$     | <0.001  |
| eGFR (mL/min/1.73 m <sup>2</sup> )   | $-0.012 \pm 0.013$    | 0.377   |                       |         |
| C-reactive protein (mg/dL)           | $-0.173 \pm 0.147$    | 0.242   |                       |         |
| TNF $\alpha$ (pg/mL)                 | $-0.052 \pm 0.104$    | 0.619   |                       |         |
| IL-6 (pg/mL)                         | $-0.053 \pm 0.096$    | 0.581   |                       |         |
| iPTH (pg/mL)                         | $-0.002 \pm 0.002$    | 0.392   |                       |         |
| 25(OH)D (ng/mL)                      | $-0.005 \pm 0.019$    | 0.782   |                       |         |
| Hemoglobin A1c (%)                   | $0.120 \pm 0.152$     | 0.431   |                       |         |
| Indoxyl sulfate (pg/mL)              | $-1.147 \pm 0.387$    | 0.004   | $-1.853 \pm 0.441$    | <0.001  |
| Muscle function                      |                       |         |                       |         |
| SMI (kg/m <sup>2</sup> )             | $0.590 \pm 0.118$     | <0.001  | $0.415 \pm 0.144$     | 0.005   |
| HGS (kg)                             | $0.062 \pm 0.018$     | 0.001   | $0.007 \pm 0.019$     | 0.704   |
| 6-m GS (m/s)                         | $0.579 \pm 0.559$     | 0.302   |                       |         |

Abbreviations: CCI, Charlson comorbidity index; eGFR, estimated glomerular filtration rate; TNF $\alpha$ , tumor necrosis factor  $\alpha$ ; IL-6, interleukin-6; iPTH, intact parathyroid; 25(OH)D, 25-hydroxyvitamin D; SMI, skeletal muscle mass index; HGS, handgrip strength; GS, gait speed.
